# Supplementary material
Source: Royal Society of Chemistry journal article supplement (doi:10.1039/d5nj04471e)
Supplement: d5nj04471e1.pdf [file d5nj04471e1.pdf]

## Supplementary Information

### Indigo-Functionalized BODIPY, Aza-BODIPY, and BOPHY Systems for CYP17A1-Targeted NIR Bioimaging in Prostate Cancer

Naveed Khan<sup>a</sup>, Rohith Ramasamy<sup>a</sup>, Rajadurai Vijay Solomon<sup>a\*</sup>

<sup>a</sup>Department of Chemistry, Madras Christian College (Autonomous),

Tambaram East, Chennai – 600 059, Tamil Nadu, India

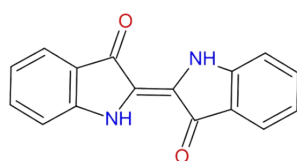

**IB0**

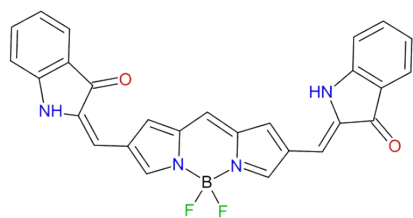

**IB1**

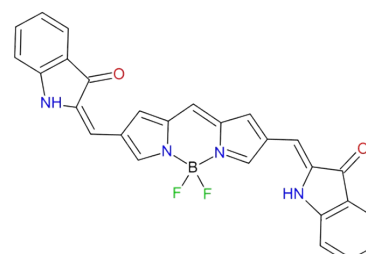

**IB2**

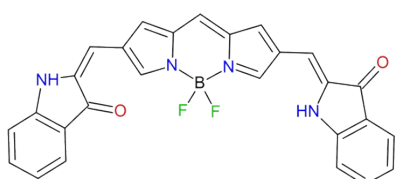

**IB3**

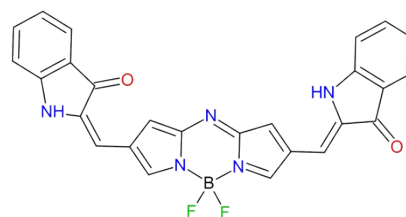

**IB4**

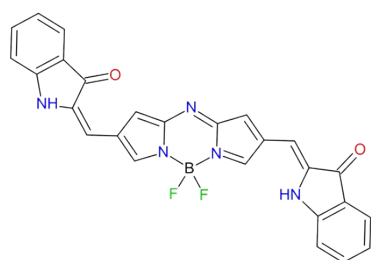

**IB5**

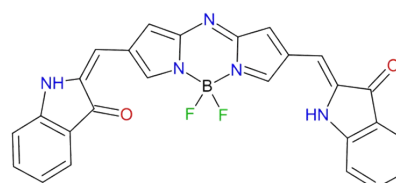

**IB6**

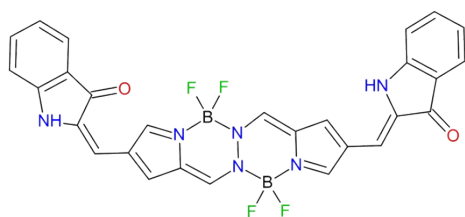

**IB7**

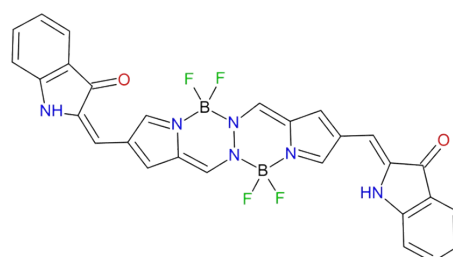

**IB8**

**SIF1.** 2D structural representation of IB0 and designed IBs

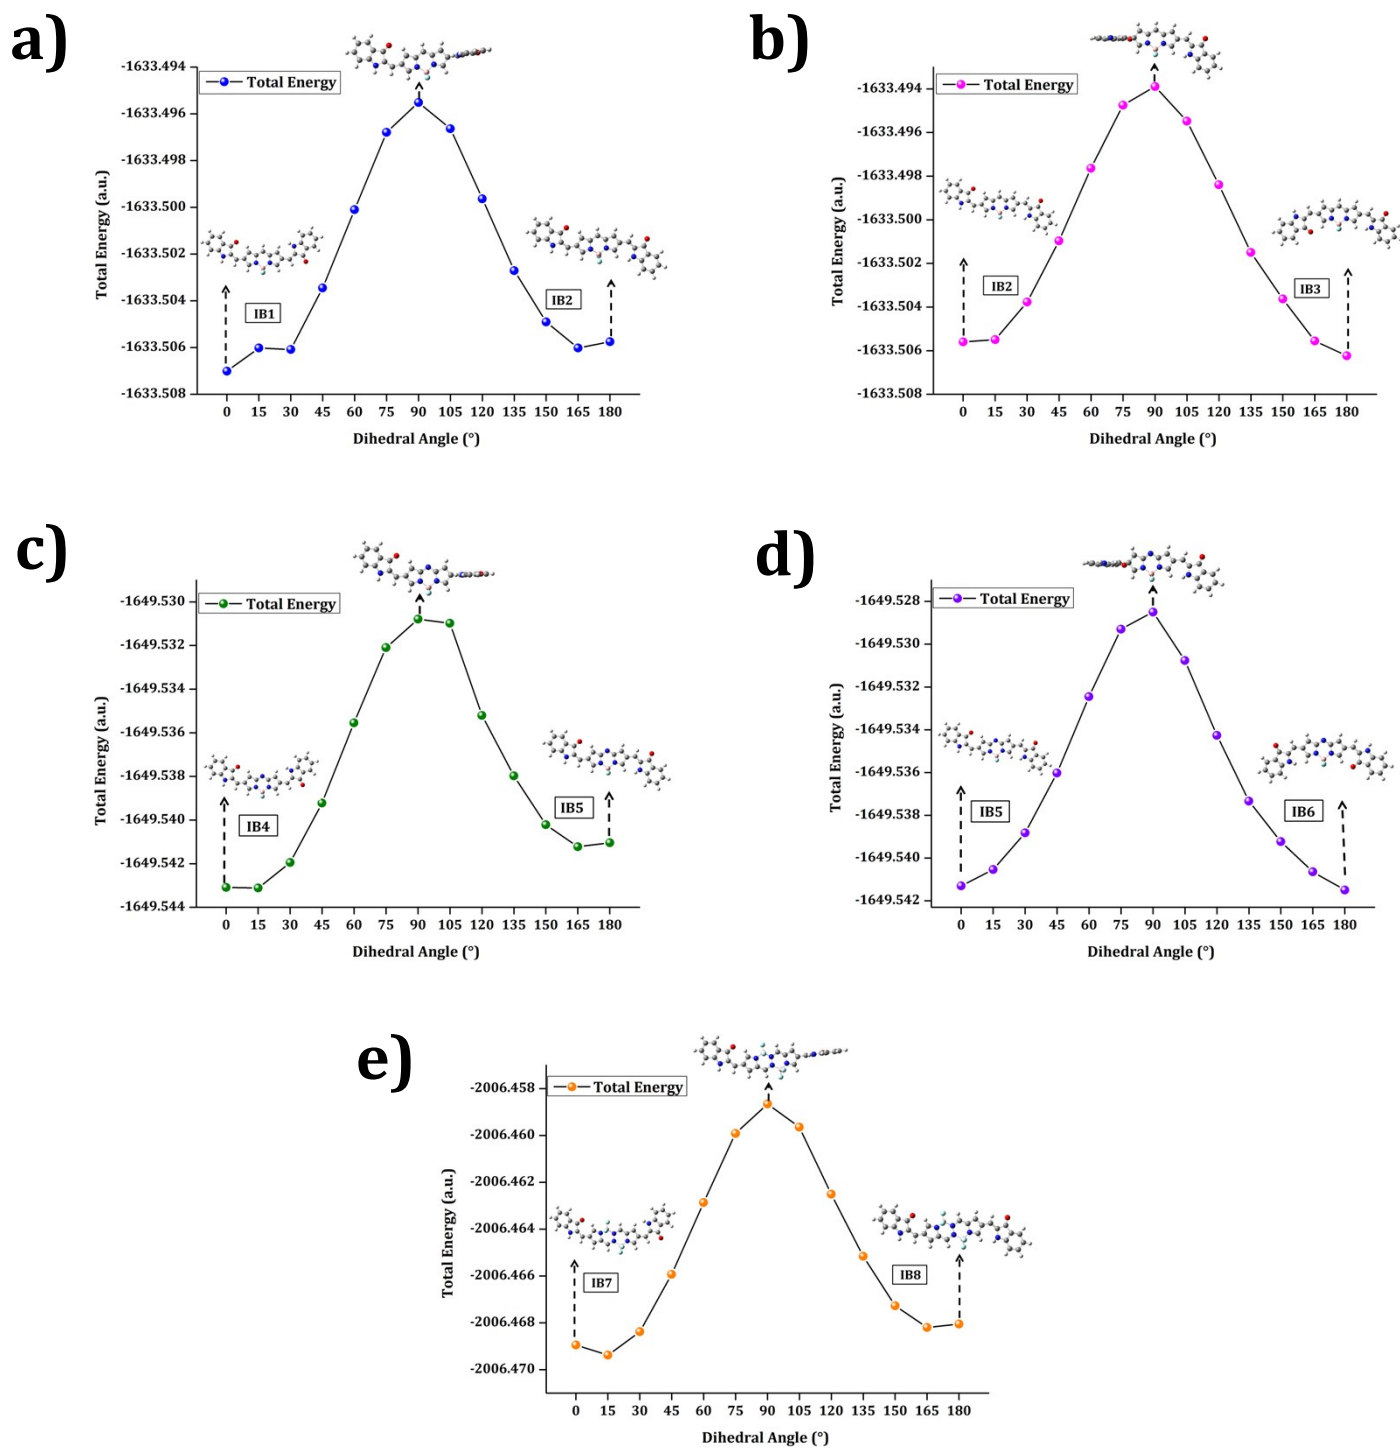

**SIF2.** Potential energy surface (PES) scan performed for the three molecular series: a) and b) BODIPY (IB1–IB3), c) and d) Aza-BODIPY (IB4–IB6), e) and f) BOPHY (IB7–IB8) to determine the barrier to interconversion. The energy profile illustrates the relative stability of each isomer and the transition barriers separating them.

a)

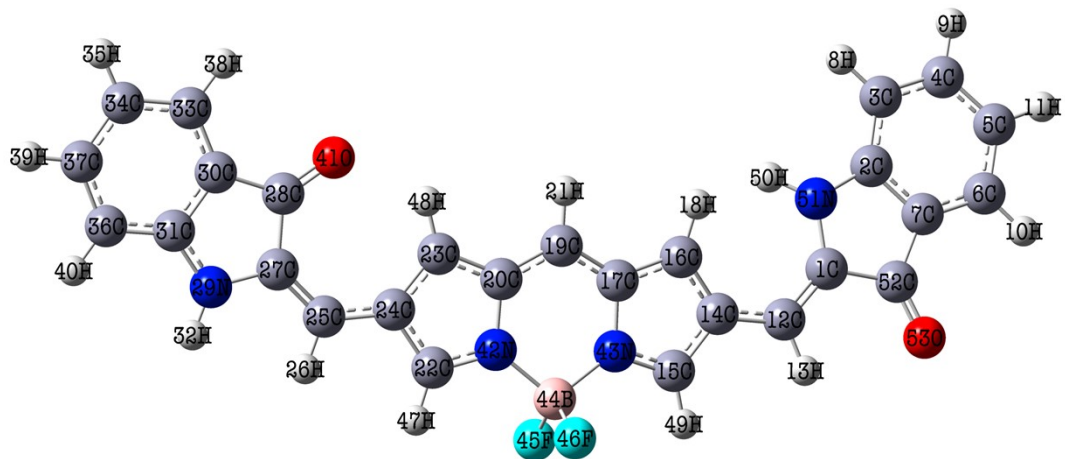

b)

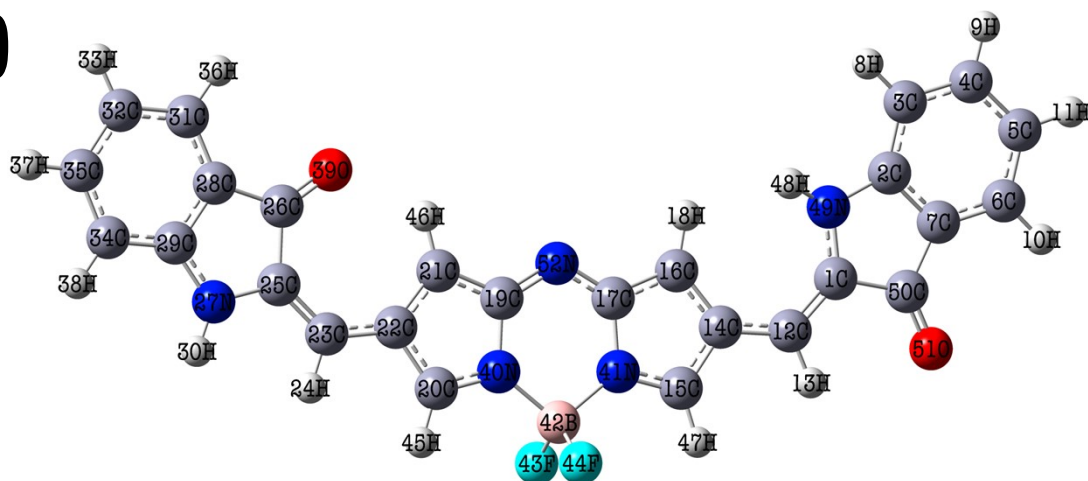

c)

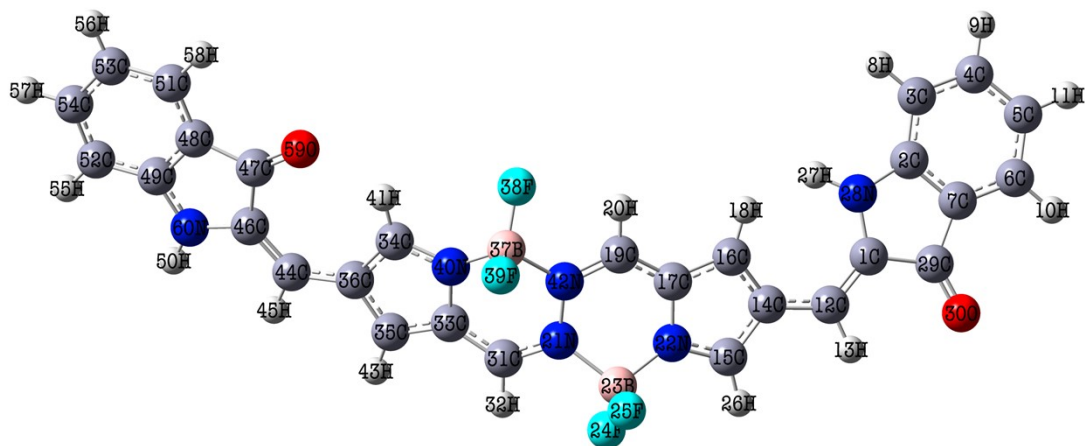

**SIF3.** Labelled molecular diagram of the designed molecular series: a) BODIPY series, b) Aza-BODIPY series, and c) BOPHY series

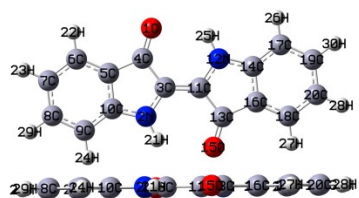

**IB0**

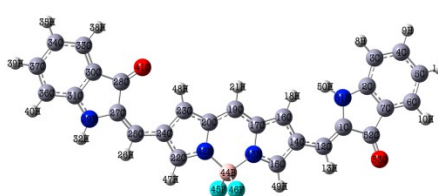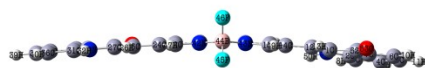

**IB1**

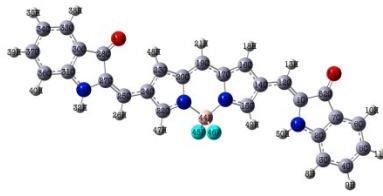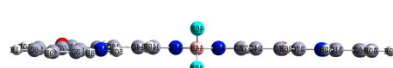

**IB2**

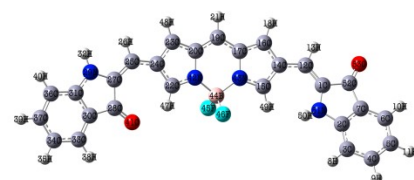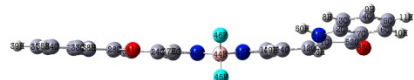

**IB3**

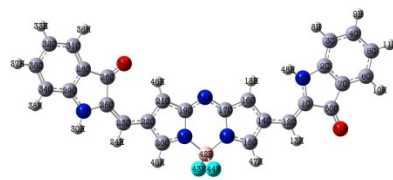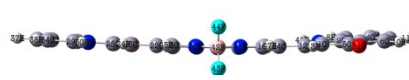

**IB4**

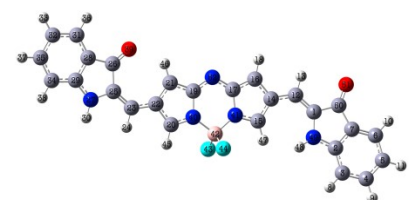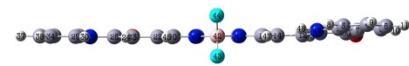

**IB5**

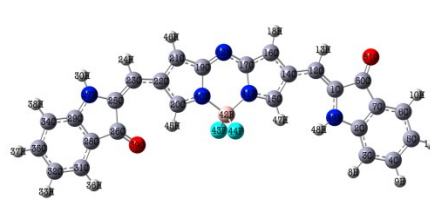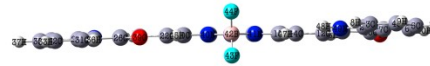

**IB6**

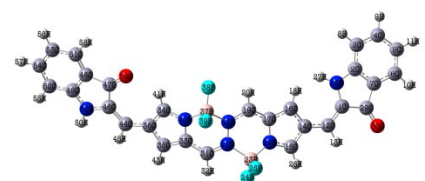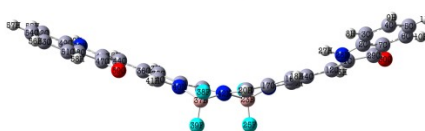

**IB7**

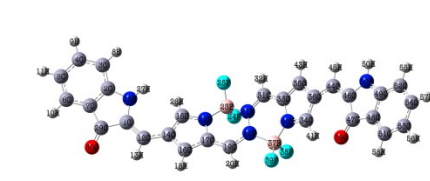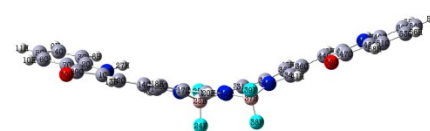

**IB8**

**SIF4.** Excited state Optimized geometry of IB0 and designed IBs at M06L/6-311G(d,p) level

**SIT1.** Computed total thermodynamic energy of IB0 and its designed IBs at M06L/6-311G(d,p) level

| Molecules | Total energy (au) |
|-----------|-------------------|
| IB0       | -875.82           |
| IB1       | -1633.51          |
| IB2       | -1633.51          |
| IB3       | -1633.51          |
| IB4       | -1649.54          |
| IB5       | -1649.54          |
| IB6       | -1649.54          |
| IB7       | -2006.47          |
| IB8       | -2006.47          |

**SIT2.** Ground-state optimized coordinates of IB0 and its designed IBs at M06L/6-311G(d,p) level

| IB0 |             |             |             | IB1 |              |             |             |
|-----|-------------|-------------|-------------|-----|--------------|-------------|-------------|
| O   | 1.13735300  | 2.36640600  | -0.00020000 | C   | -5.73533700  | -0.21973600 | -0.05117700 |
| N   | 1.48206400  | -1.11312300 | -0.00064500 | C   | -6.76124800  | 1.80207700  | 0.10564700  |
| C   | 0.68120200  | 0.00086100  | -0.00030200 | C   | -7.02260400  | 3.16143300  | 0.24499000  |
| C   | 1.54660600  | 1.20386900  | -0.00019300 | C   | -8.35644600  | 3.55407600  | 0.29807900  |
| C   | 2.90408700  | 0.67326100  | -0.00000100 | C   | -9.40848200  | 2.63132100  | 0.21596700  |
| C   | 4.14816500  | 1.29982600  | 0.00027700  | C   | -9.13568300  | 1.27678400  | 0.08713800  |
| C   | 5.29150900  | 0.51312900  | 0.00045800  | C   | -7.80697900  | 0.86511500  | 0.03760900  |
| C   | 5.18435300  | -0.88434300 | 0.00035100  | H   | -6.21991100  | 3.88807100  | 0.30745300  |
| C   | 3.95249800  | -1.53106500 | 0.00002900  | H   | -8.58653600  | 4.60957100  | 0.40487400  |
| C   | 2.81264400  | -0.73492600 | -0.00014400 | H   | -9.93257800  | 0.54130000  | 0.03184400  |
| C   | -0.68120200 | -0.00086200 | -0.00008300 | H   | -10.43344400 | 2.98203700  | 0.25725600  |
| N   | -1.48206400 | 1.11312400  | 0.00022800  | C   | -4.81805200  | -1.21488600 | -0.08725100 |

|   |             |             |             |   |             |             |             |
|---|-------------|-------------|-------------|---|-------------|-------------|-------------|
| C | -1.54660600 | -1.20386900 | 0.00001200  | H | -5.24824500 | -2.21359700 | -0.07567200 |
| C | -2.81264300 | 0.73492600  | 0.00006700  | C | -3.39189800 | -1.11414200 | -0.12848300 |
| O | -1.13735300 | -2.36640600 | 0.00001000  | C | -2.52675000 | -2.22850200 | 0.03124100  |
| C | -2.90408700 | -0.67326100 | 0.00001300  | C | -2.54778500 | -0.01148400 | -0.32855800 |
| C | -3.95249800 | 1.53106500  | 0.00006000  | C | -1.22430600 | -0.47720100 | -0.27487500 |
| C | -4.14816500 | -1.29982600 | -0.00001700 | H | -2.81713800 | 1.01516100  | -0.52647000 |
| C | -5.18435300 | 0.88434400  | 0.00000300  | C | -0.00978500 | 0.19413700  | -0.36843000 |
| C | -5.29150900 | -0.51312900 | -0.00002300 | C | 1.20474200  | -0.45817200 | -0.21014700 |
| H | 1.10891000  | -2.05268500 | 0.00038400  | H | -0.01215400 | 1.26353000  | -0.54590300 |
| H | 4.20898300  | 2.38360900  | 0.00036900  | C | 2.50778300  | -2.18589500 | 0.18824200  |
| H | 6.27234200  | 0.97501800  | 0.00069300  | C | 2.52240900  | 0.02900800  | -0.19880000 |
| H | 3.88409100  | -2.61287700 | -0.00006700 | C | 3.36881500  | -1.05882500 | 0.05806600  |
| H | -1.10891000 | 2.05268500  | -0.00046900 | C | 4.78530400  | -1.19795400 | 0.20553100  |
| H | -3.88409100 | 2.61287700  | 0.00008800  | H | 5.10588200  | -2.21807700 | 0.41461700  |
| H | -4.20898300 | -2.38360900 | -0.00004500 | C | 5.79075600  | -0.28245500 | 0.13499200  |
| H | -6.27234200 | -0.97501800 | -0.00005100 | C | 5.77013500  | 1.19233800  | -0.13294500 |
| H | 6.08867500  | -1.48399300 | 0.00051100  | N | 7.12405000  | -0.62902900 | 0.32097600  |
| H | -6.08867500 | 1.48399300  | -0.00001300 | C | 7.16800100  | 1.60359100  | -0.07489500 |
|   |             |             |             | C | 7.94730700  | 0.46548400  | 0.20266300  |
|   |             |             |             | H | 7.44110800  | -1.56513100 | 0.51769400  |
|   |             |             |             | C | 7.76477200  | 2.85117400  | -0.24021600 |
|   |             |             |             | C | 9.14370100  | 2.95010400  | -0.12597500 |
|   |             |             |             | H | 9.63627000  | 3.90788900  | -0.24909700 |
|   |             |             |             | C | 9.33292800  | 0.55326200  | 0.31981700  |
|   |             |             |             | C | 9.90912100  | 1.80703900  | 0.15127500  |
|   |             |             |             | H | 7.14988000  | 3.72023500  | -0.45318500 |
|   |             |             |             | H | 10.98696800 | 1.90197200  | 0.23745500  |
|   |             |             |             | H | 9.93852500  | -0.32012500 | 0.53413000  |
|   |             |             |             | O | 4.78657700  | 1.89445200  | -0.35329400 |
|   |             |             |             | N | 1.23591900  | -1.83539300 | 0.03174600  |
|   |             |             |             | N | -1.25176900 | -1.85371000 | -0.04775900 |
|   |             |             |             | B | -0.00124800 | -2.78929500 | 0.01472700  |
|   |             |             |             | F | -0.03517200 | -3.56108900 | 1.16315300  |
|   |             |             |             | F | 0.04301700  | -3.59448700 | -1.11507000 |
|   |             |             |             | H | 2.78348100  | -3.21394700 | 0.38705700  |
|   |             |             |             | H | 2.82715500  | 1.05179500  | -0.34740100 |
|   |             |             |             | H | -2.79663600 | -3.26243400 | 0.20279900  |

|            |              |             |             |            |             |             |             |
|------------|--------------|-------------|-------------|------------|-------------|-------------|-------------|
|            |              |             |             | H          | -4.68115200 | 1.57776500  | 0.31032300  |
|            |              |             |             | N          | -5.53866300 | 1.15389400  | -0.00994700 |
|            |              |             |             | C          | -7.20956100 | -0.46428800 | -0.06158700 |
|            |              |             |             | O          | -7.75629400 | -1.55821300 | -0.14255200 |
| <b>IB2</b> |              |             |             | <b>IB3</b> |             |             |             |
| C          | -5.71517000  | 0.93153300  | 0.00017700  | C          | 5.69369200  | -0.57471900 | 0.05412800  |
| C          | -7.29505800  | -0.70709100 | 0.00033700  | C          | 6.61609300  | 1.48541500  | -0.19960300 |
| C          | -7.94145500  | -1.93927600 | 0.00039600  | C          | 6.80368800  | 2.84458000  | -0.42744000 |
| C          | -9.33221100  | -1.93058900 | 0.00048800  | C          | 8.11357100  | 3.30825400  | -0.48658000 |
| C          | -10.07041400 | -0.73886700 | 0.00052200  | C          | 9.21291800  | 2.45390600  | -0.32197700 |
| C          | -9.41420200  | 0.48409700  | 0.00046100  | C          | 9.01365800  | 1.09847200  | -0.10186600 |
| C          | -8.02218200  | 0.49676900  | 0.00037000  | C          | 7.70840400  | 0.61479100  | -0.04756200 |
| H          | -7.38474400  | -2.86993100 | 0.00036900  | H          | 5.96231700  | 3.51697800  | -0.55421200 |
| H          | -9.86019400  | -2.87914200 | 0.00053500  | H          | 8.28722400  | 4.36491800  | -0.66401600 |
| H          | -9.96396200  | 1.42049700  | 0.00048500  | H          | 9.84980800  | 0.41598800  | 0.01748400  |
| H          | -11.15365800 | -0.77946200 | 0.00059500  | H          | 10.21756400 | 2.85851600  | -0.37119700 |
| C          | -4.55903200  | 1.63829300  | 0.00004600  | C          | 4.83002900  | -1.61495900 | 0.11452100  |
| H          | -4.71570300  | 2.71441400  | 0.00002600  | H          | 5.31162800  | -2.58849600 | 0.16323500  |
| C          | -3.19813000  | 1.19561500  | -0.00006500 | C          | 3.39790600  | -1.59353200 | 0.10291500  |
| C          | -2.68613400  | -0.12916000 | -0.00010300 | C          | 2.53502200  | -0.48062000 | 0.29419000  |
| C          | -2.06927400  | 2.02770800  | -0.00018200 | C          | 2.55174900  | -2.69490700 | -0.08109000 |
| C          | -0.93051700  | 1.20898600  | -0.00021300 | C          | 1.22882000  | -2.23257600 | -0.01764600 |
| H          | -2.06448100  | 3.10811800  | -0.00020100 | H          | 2.85050500  | -3.71785600 | -0.25980000 |
| C          | 0.42758700   | 1.51433900  | -0.00026100 | C          | 0.01236800  | -2.88852200 | -0.17951000 |
| C          | 1.40245900   | 0.52658400  | -0.00027000 | C          | -1.19743700 | -2.21288400 | -0.12866600 |
| H          | 0.73177500   | 2.55464600  | -0.00030100 | H          | 0.01233300  | -3.95620500 | -0.36717100 |
| C          | 2.14545800   | -1.54430000 | -0.00018200 | C          | -2.49606500 | -0.43408000 | 0.08069100  |
| C          | 2.80648600   | 0.60482000  | -0.00033300 | C          | -2.51903500 | -2.64917800 | -0.31237500 |
| C          | 3.29760900   | -0.70865300 | -0.00018100 | C          | -3.36053200 | -1.53629900 | -0.18659300 |
| C          | 4.60726200   | -1.28511000 | -0.00007600 | C          | -4.78327000 | -1.59227100 | -0.32531000 |
| H          | 4.60223500   | -2.37442000 | 0.00002800  | H          | -5.15536800 | -2.59272600 | -0.54312600 |
| C          | 5.84365900   | -0.71758000 | -0.00007900 | C          | -5.74363400 | -0.63137400 | -0.23365900 |
| C          | 6.27198300   | 0.71994000  | -0.00019900 | C          | -5.66303700 | 0.83934300  | 0.05721900  |
| N          | 7.00852200   | -1.47484800 | 0.00005600  | N          | -7.09243400 | -0.92058700 | -0.41096500 |
| C          | 7.72979000   | 0.67643600  | -0.00011100 | C          | -7.04475000 | 1.30248500  | 0.03668400  |
| C          | 8.12520400   | -0.67368000 | 0.00005100  | C          | -7.87093000 | 0.19959700  | -0.24671100 |
| H          | 7.02765700   | -2.48234900 | 0.00010800  | H          | -7.45254500 | -1.84468300 | -0.58866100 |

|            |              |             |             |            |              |             |             |
|------------|--------------|-------------|-------------|------------|--------------|-------------|-------------|
| C          | 8.68083600   | 1.69449000  | -0.00015900 | C          | -7.59367800  | 2.56601200  | 0.24653200  |
| C          | 10.02514200  | 1.35099100  | -0.00003200 | C          | -8.97078700  | 2.71432500  | 0.17324500  |
| H          | 10.78746100  | 2.12195200  | -0.00005800 | H          | -9.42636000  | 3.68479000  | 0.33329700  |
| C          | 9.47227600   | -1.03006900 | 0.00017700  | C          | -9.25509200  | 0.33749800  | -0.32478400 |
| C          | 10.40474000  | 0.00022900  | 0.00013700  | C          | -9.78270100  | 1.60514000  | -0.10974700 |
| H          | 8.36203400   | 2.73228000  | -0.00028400 | H          | -6.94438800  | 3.40847100  | 0.46472200  |
| H          | 11.46059300  | -0.25128400 | 0.00023500  | H          | -10.85864000 | 1.73863300  | -0.16323800 |
| H          | 9.78132300   | -2.06928800 | 0.00030300  | H          | -9.89538900  | -0.50988600 | -0.54279100 |
| O          | 5.54430700   | 1.70907200  | -0.00033400 | O          | -4.65030900  | 1.50265200  | 0.26797400  |
| N          | 1.03102200   | -0.82247200 | -0.00023300 | N          | -1.22851200  | -0.83606400 | 0.11191900  |
| N          | -1.35344200  | -0.12029900 | -0.00018000 | N          | 1.25880200   | -0.85902800 | 0.22107800  |
| B          | -0.42734300  | -1.37601000 | -0.00024000 | B          | 0.01037400   | 0.05471800  | 0.44711900  |
| F          | -0.65018600  | -2.13563000 | 1.13873900  | F          | -0.04279500  | 0.45966000  | 1.77332900  |
| F          | -0.65020800  | -2.13554000 | -1.13927600 | F          | 0.06150100   | 1.15129100  | -0.39664200 |
| H          | 2.11009500   | -2.62656400 | -0.00011800 | H          | -2.78188600  | 0.59487800  | 0.24274900  |
| H          | 3.39739100   | 1.50645600  | -0.00039000 | H          | -2.81763700  | -3.66607800 | -0.52383000 |
| H          | -3.20498900  | -1.07706000 | -0.00006500 | H          | 2.78045000   | 0.54774500  | 0.52191000  |
| H          | -5.23610200  | -1.15193300 | 0.00014900  | H          | 4.57202500   | 1.13320800  | -0.48227400 |
| N          | -5.93999500  | -0.43401200 | 0.00024300  | N          | 5.42419700   | 0.78422700  | -0.06915900 |
| C          | -7.06025500  | 1.59596500  | 0.00029800  | C          | 7.17933700   | -0.73712800 | 0.12056100  |
| O          | -7.26155100  | 2.80474600  | 0.00025400  | O          | 7.77979900   | -1.79275200 | 0.28497800  |
| <b>IB4</b> |              |             |             | <b>IB5</b> |              |             |             |
| C          | -5.66647500  | -0.16903800 | 0.04114800  | C          | -5.62899100  | 1.00394100  | 0.02775500  |
| C          | -6.70859300  | 1.85052100  | -0.05405800 | C          | -7.17919400  | -0.62373100 | -0.30470600 |
| C          | -6.97731400  | 3.21204400  | -0.14521500 | C          | -7.80357000  | -1.83079600 | -0.59771000 |
| C          | -8.31441700  | 3.59937100  | -0.15168200 | C          | -9.19439000  | -1.84873300 | -0.59112300 |
| C          | -9.36003300  | 2.67018400  | -0.07036600 | C          | -9.95120100  | -0.70486700 | -0.30168500 |
| C          | -9.07881000  | 1.31322000  | 0.01429100  | C          | -9.31645500  | 0.49722500  | -0.02288900 |
| C          | -7.74838200  | 0.90726100  | 0.01957800  | C          | -7.92438900  | 0.53490800  | -0.03126000 |
| H          | -6.17959700  | 3.94402000  | -0.20714200 | H          | -7.23034400  | -2.72437000 | -0.81869900 |
| H          | -8.55119900  | 4.65640200  | -0.22067100 | H          | -9.70699300  | -2.77937300 | -0.81355500 |
| H          | -9.87105400  | 0.57310900  | 0.07228700  | H          | -9.88188100  | 1.39869300  | 0.19278400  |
| H          | -10.38704800 | 3.01687500  | -0.07634200 | H          | -11.03356200 | -0.76501000 | -0.30110700 |
| C          | -4.75273500  | -1.17073500 | 0.05900400  | C          | -4.47355800  | 1.70122000  | 0.14291500  |
| H          | -5.19545900  | -2.16394600 | 0.07725300  | H          | -4.61269300  | 2.77134500  | 0.27428500  |
| C          | -3.32753200  | -1.09702900 | 0.05390500  | C          | -3.12738200  | 1.21761100  | 0.11446300  |
| C          | -2.50751200  | -2.26158900 | -0.01635800 | C          | -2.68684200  | -0.13454100 | 0.22971600  |

|   |             |             |             |   |             |             |             |
|---|-------------|-------------|-------------|---|-------------|-------------|-------------|
| C | -2.43907000 | -0.01940100 | 0.11810100  | C | -1.96259300 | 1.98358400  | 0.02716300  |
| C | -1.13190100 | -0.54329000 | 0.08092200  | C | -0.86495900 | 1.10327600  | 0.07501900  |
| H | -2.64391200 | 1.03604300  | 0.20436600  | H | -1.88948300 | 3.05692000  | -0.06333200 |
| C | 1.15243900  | -0.53946700 | 0.06015300  | C | 1.31925600  | 0.43340800  | 0.09373800  |
| C | 2.52139900  | -2.25763900 | -0.06959500 | C | 2.11516600  | -1.60946500 | 0.27988500  |
| C | 2.46016800  | -0.01277600 | 0.07279200  | C | 2.72638400  | 0.54488700  | 0.05688300  |
| C | 3.34589700  | -1.09018800 | -0.01029300 | C | 3.25036400  | -0.74398500 | 0.17290300  |
| C | 4.76882300  | -1.21512300 | -0.04547700 | C | 4.56867400  | -1.29315600 | 0.19634800  |
| H | 5.11841900  | -2.24513700 | -0.10482300 | H | 4.59101900  | -2.37492500 | 0.32005800  |
| C | 5.75151200  | -0.27127400 | -0.02069000 | C | 5.79055300  | -0.70103300 | 0.08138400  |
| C | 5.68003900  | 1.22772400  | 0.04708300  | C | 6.17940400  | 0.73773300  | -0.10950400 |
| N | 7.09721800  | -0.59676300 | -0.06628200 | N | 6.97074400  | -1.42402800 | 0.11796700  |
| C | 7.07014800  | 1.67016500  | 0.02837000  | C | 7.63659100  | 0.72524500  | -0.18229100 |
| C | 7.88894200  | 0.52916900  | -0.03908900 | C | 8.06684600  | -0.60608800 | -0.04300600 |
| H | 7.44886600  | -1.53996600 | -0.11866300 | H | 7.01614100  | -2.42713100 | 0.20671900  |
| C | 7.63025000  | 2.94457100  | 0.06657000  | C | 8.55994700  | 1.75339100  | -0.35544100 |
| C | 9.01218200  | 3.06469600  | 0.03617200  | C | 9.91074900  | 1.43593500  | -0.38980900 |
| H | 9.47697900  | 4.04378700  | 0.06424500  | H | 10.65211900 | 2.21503300  | -0.52434900 |
| C | 9.27638400  | 0.63678900  | -0.06919400 | C | 9.41852600  | -0.93709000 | -0.07648500 |
| C | 9.81656400  | 1.91745800  | -0.03022000 | C | 10.32405800 | 0.10304100  | -0.25187500 |
| H | 6.98658300  | 3.81720000  | 0.11805100  | H | 8.21653200  | 2.77787100  | -0.46182000 |
| H | 10.89584400 | 2.02976600  | -0.05273800 | H | 11.38431500 | -0.12701400 | -0.28223400 |
| H | 9.91080200  | -0.24075800 | -0.12047800 | H | 9.75267400  | -1.96308400 | 0.02936900  |
| O | 4.66801600  | 1.91828700  | 0.10549500  | O | 5.42447700  | 1.70119400  | -0.18639200 |
| N | 1.23557200  | -1.94241600 | -0.03011800 | N | 0.98267200  | -0.92773400 | 0.23190500  |
| N | -1.21935000 | -1.94250100 | -0.00454700 | N | -1.35909800 | -0.20268800 | 0.20430300  |
| B | 0.00777300  | -2.90797100 | -0.05648700 | B | -0.47489400 | -1.48593200 | 0.27580900  |
| F | 0.01991800  | -3.73462800 | 1.05295900  | F | -0.70004900 | -2.17435400 | 1.45382300  |
| F | -0.00527100 | -3.64767600 | -1.22514500 | F | -0.71087800 | -2.29478200 | -0.82290700 |
| H | 2.84436800  | -3.28952700 | -0.13798400 | H | 2.11784100  | -2.68786800 | 0.38442000  |
| H | 2.71555900  | 1.03112100  | 0.13242800  | H | 3.28217000  | 1.46180900  | -0.04359500 |
| H | -2.83123800 | -3.29324900 | -0.07513400 | H | -3.27318000 | -1.03314200 | 0.37129200  |
| H | -4.61325300 | 1.65833700  | -0.21490300 | H | -5.14388000 | -0.91830300 | -0.69696300 |
| N | -5.48445600 | 1.19927300  | -0.00439400 | N | -5.81916100 | -0.35205600 | -0.20518100 |
| C | -7.14256200 | -0.42007400 | 0.08181000  | C | -6.98090700 | 1.63046700  | 0.18207000  |
| O | -7.67943500 | -1.51821400 | 0.15468800  | O | -7.20036800 | 2.80694100  | 0.44141000  |
| N | 0.01094900  | 0.12421200  | 0.11461600  | N | 0.42579100  | 1.40236700  | 0.02165300  |

| IB6 |             |             |             | IB7 |             |             |             |
|-----|-------------|-------------|-------------|-----|-------------|-------------|-------------|
| C   | 5.68918300  | -0.56618500 | 0.00065700  | C   | 6.71734200  | 0.13800800  | -0.31166600 |
| C   | 6.84108100  | 1.39734300  | 0.00027500  | C   | 7.48497200  | 2.26704400  | -0.11748900 |
| C   | 7.17799800  | 2.74650100  | -0.00015000 | C   | 7.57232500  | 3.64551000  | 0.04804000  |
| C   | 8.53236400  | 3.06599000  | 0.00010300  | C   | 8.81701300  | 4.23579800  | -0.14660600 |
| C   | 9.53005500  | 2.08143500  | 0.00076100  | C   | 9.95018500  | 3.48675700  | -0.49306600 |
| C   | 9.18044600  | 0.73781300  | 0.00116400  | C   | 9.84945900  | 2.11331400  | -0.66390700 |
| C   | 7.83066100  | 0.39879100  | 0.00092300  | C   | 8.60948400  | 1.50669000  | -0.48128100 |
| H   | 6.41755200  | 3.51966800  | -0.00065800 | H   | 6.70568000  | 4.23829300  | 0.31840400  |
| H   | 8.82197900  | 4.11187200  | -0.00021300 | H   | 8.91087900  | 5.31028400  | -0.02491700 |
| H   | 9.93461400  | -0.04341300 | 0.00166300  | H   | 10.70989200 | 1.51282500  | -0.94232100 |
| H   | 10.57327000 | 2.37550600  | 0.00094000  | H   | 10.90203400 | 3.98720700  | -0.63041300 |
| C   | 4.74017900  | -1.53447400 | 0.00068900  | C   | 5.93075600  | -0.95877700 | -0.39229800 |
| H   | 5.15974300  | -2.53814300 | 0.00103500  | H   | 6.44848000  | -1.84861500 | -0.74287000 |
| C   | 3.31357600  | -1.45030600 | 0.00033400  | C   | 4.53482300  | -1.08741500 | -0.09227300 |
| C   | 2.48313600  | -0.29026100 | 0.00020000  | C   | 3.77096900  | -2.23267000 | -0.41977000 |
| C   | 2.43358000  | -2.53578500 | 0.00011100  | C   | 3.64941300  | -0.20935900 | 0.55835900  |
| C   | 1.12171700  | -2.02816000 | -0.00017400 | C   | 2.39695400  | -0.83364100 | 0.58303100  |
| H   | 2.69088200  | -3.58423200 | 0.00014000  | H   | 3.85713900  | 0.75778200  | 0.99078400  |
| C   | -1.16152300 | -2.04652100 | -0.00061600 | C   | 1.16510400  | -0.39912700 | 1.06819200  |
| C   | -2.54483000 | -0.31980600 | -0.00065100 | H   | 1.08327500  | 0.52426800  | 1.62855600  |
| C   | -2.46955200 | -2.57102900 | -0.00080000 | N   | 0.03395700  | -2.19691900 | 0.13085500  |
| C   | -3.36105400 | -1.49750100 | -0.00079300 | N   | 2.50287700  | -2.07126900 | -0.03488600 |
| C   | -4.78348700 | -1.62765300 | -0.00085200 | B   | 1.35610600  | -3.09336200 | 0.04680700  |
| H   | -5.12142900 | -2.66293500 | -0.00100600 | F   | 1.27096200  | -3.87957700 | -1.07603000 |
| C   | -5.78002100 | -0.69764500 | -0.00067400 | F   | 1.44927600  | -3.83666100 | 1.20798200  |
| C   | -5.75043100 | 0.80595500  | -0.00036200 | H   | 4.09747600  | -3.14272200 | -0.90444800 |
| N   | -7.11946300 | -1.05854700 | -0.00068200 | H   | 5.44231800  | 1.79609600  | -0.00873400 |
| C   | -7.15063500 | 1.20853600  | -0.00016100 | N   | 6.38355000  | 1.43773800  | 0.04791800  |
| C   | -7.94083300 | 0.04603600  | -0.00033600 | C   | 8.18018600  | 0.11713300  | -0.62326400 |
| H   | -7.44500200 | -2.01247200 | -0.00074800 | O   | 8.83661400  | -0.87212100 | -0.92530600 |
| C   | -7.73894000 | 2.47059800  | 0.00018100  | C   | -1.09031800 | -2.55834900 | -0.46648600 |
| C   | -9.12326100 | 2.55763300  | 0.00036700  | H   | -1.00621100 | -3.44938500 | -1.07634700 |
| H   | -9.61116600 | 3.52580500  | 0.00064800  | C   | -2.29505100 | -1.87067400 | -0.37233500 |
| C   | -9.33096900 | 0.12088300  | -0.00015700 | C   | -3.64737600 | -0.28477600 | 0.36819900  |
| C   | -9.90030900 | 1.38974400  | 0.00020100  | C   | -3.50122000 | -2.02169800 | -1.06220200 |
| H   | -7.11400300 | 3.35800900  | 0.00031200  | C   | -4.37087900 | -1.01273800 | -0.61359800 |

|            |              |             |             |   |              |             |             |
|------------|--------------|-------------|-------------|---|--------------|-------------|-------------|
| H          | -10.98224400 | 1.47587000  | 0.00035700  | B | -1.34528100  | -0.52592600 | 1.56133100  |
| H          | -9.94637000  | -0.77139700 | -0.00028200 | F | -1.21114400  | 0.80713300  | 1.86063700  |
| O          | -4.76177400  | 1.53352400  | -0.00034000 | F | -1.56607400  | -1.30500700 | 2.68119300  |
| N          | -1.25910100  | -0.64205300 | -0.00055600 | N | -2.41809300  | -0.79124100 | 0.49397400  |
| N          | 1.19714200   | -0.62714000 | -0.00009700 | H | -3.99424600  | 0.54935600  | 0.95839600  |
| B          | -0.03741200  | 0.33159100  | -0.00035700 | N | 0.01895700   | -1.02970500 | 0.88356700  |
| F          | -0.04008300  | 1.11500200  | 1.13947100  | H | -3.70578500  | -2.76285800 | -1.82131000 |
| F          | -0.03961600  | 1.11492700  | -1.14023900 | C | -5.69803200  | -0.83289600 | -1.12565800 |
| H          | -2.89217700  | 0.70421300  | -0.00061300 | H | -5.95785800  | -1.54636800 | -1.90656600 |
| H          | -2.71084600  | -3.62342300 | -0.00087200 | C | -6.67430200  | 0.06174800  | -0.81577500 |
| H          | 2.75680700   | 0.75569200  | 0.00037200  | C | -6.72700800  | 1.16626700  | 0.19840800  |
| H          | 4.73414100   | 1.34417400  | -0.00047000 | C | -8.05009500  | 1.75572400  | 0.04352600  |
| N          | 5.58674400   | 0.81123000  | 0.00016000  | C | -8.72175000  | 1.06116600  | -0.97907100 |
| C          | 7.15457800   | -0.89534500 | 0.00119500  | H | -8.14622600  | -0.54534800 | -2.22702000 |
| O          | 7.63292400   | -2.02249700 | 0.00169000  | C | -8.66664700  | 2.81415300  | 0.70752300  |
| N          | -0.01772900  | -2.70489500 | -0.00044000 | C | -10.01519400 | 1.41447400  | -1.35933400 |
|            |              |             |             | C | -9.95450600  | 3.17236100  | 0.33874600  |
|            |              |             |             | C | -10.61162400 | 2.47379300  | -0.68627100 |
|            |              |             |             | H | -10.53581300 | 0.88402400  | -2.14869600 |
|            |              |             |             | H | -10.45938300 | 3.99160100  | 0.83754400  |
|            |              |             |             | H | -11.61905200 | 2.76799100  | -0.96372600 |
|            |              |             |             | H | -8.13631200  | 3.34029400  | 1.49534500  |
|            |              |             |             | O | -5.84467900  | 1.49559500  | 0.98830400  |
|            |              |             |             | N | -7.90738700  | 0.06625300  | -1.46291700 |
| <b>IBB</b> |              |             |             |   |              |             |             |
| C          | 6.72859200   | 0.65659000  | 0.71887000  |   |              |             |             |
| C          | 8.00174000   | -1.22211600 | 0.62664700  |   |              |             |             |
| C          | 8.43381300   | -2.53564100 | 0.47768900  |   |              |             |             |
| C          | 9.75217600   | -2.81863600 | 0.81869600  |   |              |             |             |
| C          | 10.62566000  | -1.83024600 | 1.29414200  |   |              |             |             |
| C          | 10.18073600  | -0.52539700 | 1.44833400  |   |              |             |             |
| C          | 8.86064300   | -0.22520200 | 1.11866200  |   |              |             |             |
| H          | 7.77015800   | -3.30934100 | 0.10773700  |   |              |             |             |
| H          | 10.11387500  | -3.83640200 | 0.71110100  |   |              |             |             |
| H          | 10.83504400  | 0.25442800  | 1.82603400  |   |              |             |             |
| H          | 11.64727900  | -2.09320800 | 1.54387100  |   |              |             |             |
| C          | 5.69397100   | 1.52650400  | 0.68641600  |   |              |             |             |

|   |             |             |             |
|---|-------------|-------------|-------------|
| H | 5.91715000  | 2.50600300  | 1.10157800  |
| C | 4.36361000  | 1.30542100  | 0.19482800  |
| C | 3.90654400  | 0.25285500  | -0.63580700 |
| C | 3.24571900  | 2.12247300  | 0.42984700  |
| C | 2.15848200  | 1.53559600  | -0.22496500 |
| H | 3.21395300  | 3.01756400  | 1.03348700  |
| C | 0.80987500  | 1.88512500  | -0.26862800 |
| H | 0.46341400  | 2.81713100  | 0.16094100  |
| N | 0.21172200  | -0.09392800 | -1.32501400 |
| N | 2.59792100  | 0.39001600  | -0.87165800 |
| B | 1.69379700  | -0.34813200 | -1.87231100 |
| F | 1.78623700  | 0.21467400  | -3.13100800 |
| F | 1.92448400  | -1.70222900 | -1.88367900 |
| H | 4.46134800  | -0.54516400 | -1.10847000 |
| H | 5.93242200  | -1.25668000 | 0.31974800  |
| N | 6.75969000  | -0.67798300 | 0.32360800  |
| C | 8.09628300  | 1.01738700  | 1.20638700  |
| O | 8.45624600  | 2.12641200  | 1.58255600  |
| C | -0.72918100 | -1.01965400 | -1.42111700 |
| H | -0.38201000 | -1.97046400 | -1.80596000 |
| C | -2.05745900 | -0.84436300 | -1.05082500 |
| C | -3.80218200 | 0.30075300  | -0.31785100 |
| C | -3.11610000 | -1.75150200 | -0.95212700 |
| C | -4.23323700 | -1.04360900 | -0.47609600 |
| B | -1.65991800 | 1.65861100  | -0.90065400 |
| F | -1.85204400 | 2.12293900  | -2.18799900 |
| F | -1.84716300 | 2.63235400  | 0.04809000  |
| N | -2.51255900 | 0.40522700  | -0.64839100 |
| H | -4.38750500 | 1.14790900  | 0.00510800  |
| N | -0.14456400 | 1.13813600  | -0.79285200 |
| H | -3.06746200 | -2.80654400 | -1.17986300 |
| C | -5.50628700 | -1.65878000 | -0.24145500 |
| H | -5.51851700 | -2.72150400 | -0.47956800 |
| C | -6.68760600 | -1.16001800 | 0.21103100  |
| C | -7.08474900 | 0.21910600  | 0.64827600  |
| C | -8.48908000 | 0.10451400  | 1.02072900  |
| C | -8.88812300 | -1.22944000 | 0.81615600  |

|   |              |             |            |
|---|--------------|-------------|------------|
| H | -7.85595800  | -2.93348500 | 0.10687600 |
| C | -9.39311700  | 1.05204700  | 1.49610100 |
| C | -10.19498400 | -1.63756000 | 1.07838500 |
| C | -10.69551200 | 0.65611300  | 1.76215000 |
| C | -11.08086200 | -0.67691400 | 1.55037000 |
| H | -10.50861200 | -2.66361400 | 0.92024700 |
| H | -11.42083600 | 1.37114700  | 2.13286900 |
| H | -12.10465000 | -0.96965600 | 1.76170400 |
| H | -9.07073000  | 2.07770200  | 1.64853900 |
| O | -6.37508100  | 1.22169300  | 0.68144700 |
| N | -7.82033800  | -1.95648400 | 0.34989400 |

**SIT3.** FMO Energies of IB0 and designed IBs from HOMO-2 to LUMO+2 and the HOMO-LUMO energy gap computed at M06L/6-311G(d,p) level

| <b>Molecules</b> | <b>HOMO-2<br/>(eV)</b> | <b>HOMO-1<br/>(eV)</b> | <b>HOMO<br/>(eV)</b> | <b>LUMO<br/>(eV)</b> | <b>LUMO+1<br/>(eV)</b> | <b>LUMO+2<br/>(eV)</b> | <b>HOMO-LUMO<br/>Energy gap (eV)</b> |
|------------------|------------------------|------------------------|----------------------|----------------------|------------------------|------------------------|--------------------------------------|
| IB0              | -6.163                 | -5.938                 | -5.012               | -3.580               | -1.960                 | -1.029                 | 1.432                                |
| IB1              | -6.057                 | -5.267                 | -4.988               | -3.807               | -2.950                 | -2.900                 | 1.181                                |
| IB2              | -6.042                 | -5.218                 | -4.983               | -3.796               | -2.948                 | -2.927                 | 1.187                                |
| IB3              | -6.014                 | -5.261                 | -5.014               | -3.796               | -2.975                 | -2.934                 | 1.218                                |
| IB4              | -6.150                 | -5.352                 | -5.043               | -4.201               | -3.034                 | -2.971                 | 0.842                                |
| IB5              | -6.124                 | -5.358                 | -5.085               | -4.220               | -3.056                 | -2.992                 | 0.865                                |
| IB6              | -6.110                 | -5.307                 | -5.060               | -4.208               | -3.074                 | -2.986                 | 0.852                                |
| IB7              | -6.066                 | -5.203                 | -5.069               | -3.617               | -3.063                 | -2.920                 | 1.452                                |
| IB8              | -6.049                 | -5.225                 | -5.069               | -3.611               | -3.055                 | -2.950                 | 1.458                                |

**SIT4.** Excited-state optimized coordinates of IBO and its designed IBs at M06L/6-311G(d,p) level

| IB0 |             |             |             | IB1 |              |             |             |
|-----|-------------|-------------|-------------|-----|--------------|-------------|-------------|
| O   | -1.13471500 | -2.40585600 | 0.00000100  | C   | 5.74922200   | -0.22085600 | -0.02740700 |
| N   | -1.48981900 | 1.08380800  | -0.00010400 | C   | 6.83319600   | 1.77796500  | -0.06776900 |
| C   | -0.68954500 | -0.03784100 | -0.00013200 | C   | 7.13550000   | 3.13675400  | -0.10146300 |
| C   | -1.53250000 | -1.22461100 | -0.00003500 | C   | 8.47990300   | 3.49095200  | -0.14674000 |
| C   | -2.89696200 | -0.69110200 | 0.00009300  | C   | 9.50151400   | 2.53060300  | -0.16043400 |
| C   | -4.14285600 | -1.29969300 | 0.00024500  | C   | 9.18748300   | 1.17740300  | -0.13498300 |
| C   | -5.28789000 | -0.49596300 | 0.00033800  | C   | 7.84902400   | 0.80283600  | -0.09138300 |
| C   | -5.18764100 | 0.90004000  | 0.00027500  | H   | 6.35520500   | 3.89006700  | -0.08950500 |
| C   | -3.94733400 | 1.53505800  | 0.00012600  | H   | 8.74328100   | 4.54341400  | -0.17132100 |
| C   | -2.81390900 | 0.72584700  | 0.00004300  | H   | 9.96247700   | 0.41692800  | -0.15261500 |
| C   | 0.68954500  | 0.03784300  | -0.00017500 | H   | 10.53673700  | 2.85070000  | -0.19358500 |
| N   | 1.48981900  | -1.08380700 | -0.00017300 | C   | 4.79217000   | -1.18774300 | -0.01309800 |
| C   | 1.53250100  | 1.22461200  | -0.00013600 | H   | 5.19519300   | -2.19602600 | -0.08284000 |
| C   | 2.81390800  | -0.72584700 | -0.00011600 | C   | 3.37770100   | -1.06064800 | 0.07350700  |
| O   | 1.13471700  | 2.40585800  | -0.00014800 | C   | 2.50685000   | -2.16903700 | -0.05105800 |
| C   | 2.89696200  | 0.69110200  | -0.00008800 | C   | 2.54326600   | 0.05982700  | 0.28173500  |
| C   | 3.94733300  | -1.53505900 | -0.00006200 | C   | 1.21399900   | -0.39318100 | 0.26628200  |
| C   | 4.14285600  | 1.29969200  | -0.00002700 | H   | 2.82302100   | 1.08800500  | 0.45409900  |
| C   | 5.18764000  | -0.90004100 | 0.00000200  | C   | 0.00260600   | 0.27823100  | 0.38119000  |
| C   | 5.28789000  | 0.49596100  | 0.00001200  | C   | -1.22281100  | -0.41133500 | 0.24168900  |
| H   | -1.09304800 | 2.01941300  | -0.00003300 | H   | -0.00760200  | 1.34832600  | 0.54067400  |
| H   | -4.22284200 | -2.38226900 | 0.00028800  | C   | -2.52088700  | -2.18306700 | -0.11647000 |
| H   | -6.26868100 | -0.95926300 | 0.00045600  | C   | -2.52892100  | 0.05660000  | 0.22743900  |
| H   | -3.86413900 | 2.61600600  | 0.00007400  | C   | -3.37448000  | -1.06924300 | -0.00536900 |
| H   | 1.09304800  | -2.01941200 | -0.00023600 | C   | -4.77996500  | -1.18487900 | -0.14158200 |
| H   | 3.86413800  | -2.61600700 | -0.00006300 | H   | -5.12378300  | -2.20249300 | -0.32805300 |
| H   | 4.22284300  | 2.38226900  | -0.00001000 | C   | -5.78253900  | -0.24928300 | -0.09021400 |
| H   | 6.26868200  | 0.95926100  | 0.00006200  | C   | -5.80031000  | 1.21858400  | 0.13774500  |
| H   | -6.08997500 | 1.50087400  | 0.00034300  | N   | -7.10975900  | -0.63382200 | -0.28319300 |
| H   | 6.08997400  | -1.50087500 | 0.00004400  | C   | -7.21625300  | 1.59239200  | 0.04628400  |
|     |             |             |             | C   | -7.96576400  | 0.42502200  | -0.21211100 |
|     |             |             |             | H   | -7.39431800  | -1.58691400 | -0.46701600 |
|     |             |             |             | C   | -7.84913300  | 2.81813700  | 0.16273400  |
|     |             |             |             | C   | -9.23473000  | 2.86455000  | 0.01693100  |
|     |             |             |             | H   | -9.75539000  | 3.81146400  | 0.10151300  |
|     |             |             |             | C   | -9.35574300  | 0.45874800  | -0.35916100 |
|     |             |             |             | C   | -9.96987400  | 1.69636400  | -0.24047700 |
|     |             |             |             | H   | -7.27163200  | 3.71501000  | 0.36027400  |
|     |             |             |             | H   | -11.04658100 | 1.76312300  | -0.34899800 |
|     |             |             |             | H   | -9.92545100  | -0.44127800 | -0.55800300 |
|     |             |             |             | O   | -4.85189400  | 1.96520500  | 0.35597700  |

|            |             |             |             |            |             |             |             |
|------------|-------------|-------------|-------------|------------|-------------|-------------|-------------|
|            |             |             |             | N          | -1.24286200 | -1.79245600 | 0.02964000  |
|            |             |             |             | N          | 1.23254200  | -1.78151100 | 0.05603100  |
|            |             |             |             | B          | -0.00503400 | -2.72000800 | 0.05502500  |
|            |             |             |             | F          | 0.01575500  | -3.55012600 | -1.06428100 |
|            |             |             |             | F          | -0.00990600 | -3.50747100 | 1.21123300  |
|            |             |             |             | H          | -2.77633500 | -3.21865000 | -0.29201900 |
|            |             |             |             | H          | -2.85154200 | 1.07741300  | 0.35304500  |
|            |             |             |             | H          | 2.76566000  | -3.20670300 | -0.21502300 |
|            |             |             |             | H          | 4.73089600  | 1.63946600  | -0.15550400 |
|            |             |             |             | N          | 5.60067800  | 1.15691500  | 0.00523000  |
|            |             |             |             | C          | 7.20803300  | -0.51081800 | -0.07244200 |
|            |             |             |             | O          | 7.72366400  | -1.62602900 | -0.08435400 |
| <b>IB2</b> |             |             |             | <b>IB3</b> |             |             |             |
| C          | 5.73000800  | 0.94074300  | 0.00819900  | C          | 5.70445400  | -0.57939700 | 0.01910100  |
| C          | 7.27552900  | -0.72652000 | -0.07665100 | C          | 6.60305400  | 1.49622700  | -0.19972600 |
| C          | 7.89113100  | -1.97379600 | -0.14877600 | C          | 6.77411300  | 2.86395400  | -0.39195200 |
| C          | 9.28046600  | -1.99485700 | -0.14865700 | C          | 8.07847100  | 3.34264400  | -0.44633200 |
| C          | 10.03848600 | -0.81752800 | -0.08047600 | C          | 9.18583500  | 2.49350800  | -0.31182000 |
| C          | 9.41083000  | 0.42256000  | -0.01116400 | C          | 9.00250400  | 1.12906900  | -0.12539500 |
| C          | 8.02305700  | 0.46538200  | -0.01046600 | C          | 7.70436000  | 0.62978500  | -0.07464100 |
| H          | 7.31133100  | -2.88825500 | -0.20116400 | H          | 5.92426600  | 3.52971500  | -0.49431100 |
| H          | 9.79107400  | -2.95056200 | -0.20342900 | H          | 8.24122400  | 4.40526900  | -0.59540200 |
| H          | 9.98477600  | 1.34234600  | 0.03952000  | H          | 9.84788300  | 0.45445500  | -0.02892000 |
| H          | 11.12067200 | -0.87915600 | -0.08273700 | H          | 10.18650200 | 2.90853600  | -0.35703800 |
| C          | 4.56236000  | 1.64359500  | 0.03872500  | C          | 4.83462300  | -1.62246100 | 0.07535000  |
| H          | 4.72126600  | 2.72005900  | 0.06409000  | H          | 5.32238400  | -2.59472400 | 0.10031200  |
| C          | 3.21076300  | 1.20273100  | 0.03668400  | C          | 3.40872900  | -1.60813300 | 0.08371700  |
| C          | 2.69320600  | -0.10959000 | 0.07914400  | C          | 2.54716600  | -0.50364100 | 0.28448500  |
| C          | 2.08275500  | 2.06109100  | -0.00530900 | C          | 2.56556400  | -2.72623600 | -0.09387900 |
| C          | 0.93876100  | 1.26340000  | 0.00610300  | C          | 1.23886400  | -2.27934600 | -0.01887100 |
| H          | 2.10148600  | 3.14051200  | -0.04381500 | H          | 2.87719700  | -3.74264800 | -0.28597700 |
| C          | -0.42491900 | 1.58352300  | -0.01713000 | C          | 0.01998000  | -2.93512700 | -0.17061900 |
| C          | -1.39992800 | 0.57340800  | 0.01424400  | C          | -1.19513100 | -2.21703000 | -0.11072000 |
| H          | -0.73048800 | 2.62047300  | -0.05560000 | H          | 0.00004600  | -3.99937500 | -0.36336500 |
| C          | -2.13291200 | -1.52437300 | 0.08708500  | C          | -2.47610000 | -0.39457100 | 0.11774400  |
| C          | -2.79220600 | 0.63791400  | 0.00451400  | C          | -2.50825200 | -2.62266200 | -0.29645600 |
| C          | -3.27505400 | -0.69836600 | 0.05012800  | C          | -3.34016900 | -1.46994200 | -0.15571200 |
| C          | -4.58181900 | -1.25328800 | 0.05592600  | C          | -4.75102400 | -1.53842300 | -0.29757800 |
| H          | -4.59432200 | -2.34271100 | 0.09051200  | H          | -5.12353900 | -2.53881900 | -0.51701200 |
| C          | -5.82252000 | -0.67469600 | 0.02194600  | C          | -5.72338500 | -0.57589200 | -0.20765400 |
| C          | -6.28128600 | 0.74054300  | -0.02256600 | C          | -5.67252600 | 0.87778600  | 0.07469300  |
| N          | -6.97336700 | -1.46273100 | 0.02632200  | N          | -7.06746000 | -0.89725800 | -0.39456900 |
| C          | -7.74405700 | 0.65740700  | -0.04319800 | C          | -7.07169300 | 1.31753200  | 0.03016300  |
| C          | -8.10831100 | -0.70437700 | -0.01405600 | C          | -7.87418500 | 0.19218100  | -0.26055900 |
| H          | -6.96222200 | -2.47244700 | 0.04588500  | H          | -7.39927200 | -1.83029100 | -0.60179500 |

|            |              |             |             |            |              |             |             |
|------------|--------------|-------------|-------------|------------|--------------|-------------|-------------|
| C          | -8.71887600  | 1.64365900  | -0.08588900 | C          | -7.65581300  | 2.55916400  | 0.21687100  |
| C          | -10.05614000 | 1.25710700  | -0.09973500 | C          | -9.04230200  | 2.66166700  | 0.11015500  |
| H          | -10.83776800 | 2.00758400  | -0.13323000 | H          | -9.52402900  | 3.62206600  | 0.25216700  |
| C          | -9.44663300  | -1.10432500 | -0.02810600 | C          | -9.26520900  | 0.28345900  | -0.37157300 |
| C          | -10.40559500 | -0.10219800 | -0.07179000 | C          | -9.82887000  | 1.53495200  | -0.18060900 |
| H          | -8.43382500  | 2.69047500  | -0.10775900 | H          | -7.04249700  | 3.42526800  | 0.44082800  |
| H          | -11.45430700 | -0.37850400 | -0.08400200 | H          | -10.90441100 | 1.64688100  | -0.25735700 |
| H          | -9.72249300  | -2.15235400 | -0.00661800 | H          | -9.87149100  | -0.58569800 | -0.59611900 |
| O          | -5.59340000  | 1.75749000  | -0.03800000 | O          | -4.67886000  | 1.56248100  | 0.29754000  |
| N          | -1.02028600  | -0.77464500 | 0.06648000  | N          | -1.20512300  | -0.84460800 | 0.14269400  |
| N          | 1.35176700   | -0.07455700 | 0.06019200  | N          | 1.26738000   | -0.89879000 | 0.22674500  |
| B          | 0.42609800   | -1.31689400 | 0.07536900  | B          | 0.03631400   | 0.00903400  | 0.48741000  |
| F          | 0.65906500   | -2.10883000 | -1.05372700 | F          | 0.00313600   | 0.40243900  | 1.83059800  |
| F          | 0.65795000   | -2.08467500 | 1.22009400  | F          | 0.09765900   | 1.14758600  | -0.31745900 |
| H          | -2.08213700  | -2.60396400 | 0.12509700  | H          | -2.71884300  | 0.63972600  | 0.29396200  |
| H          | -3.39473100  | 1.53083700  | -0.03033600 | H          | -2.83921400  | -3.62745800 | -0.51840500 |
| H          | 3.19391000   | -1.06472400 | 0.14435400  | H          | 2.78106500   | 0.52398000  | 0.52482000  |
| H          | 5.20811400   | -1.11831000 | -0.16177100 | H          | 4.54666600   | 1.13616200  | -0.42880400 |
| N          | 5.93116400   | -0.42492600 | -0.05390800 | N          | 5.42614900   | 0.77666300  | -0.08878900 |
| C          | 7.07517800   | 1.58126000  | 0.04302200  | C          | 7.18558500   | -0.73129800 | 0.06688100  |
| O          | 7.29808300   | 2.78504400  | 0.10584200  | O          | 7.79996800   | -1.78586900 | 0.20047900  |
| <b>IB4</b> |              |             |             | <b>IB5</b> |              |             |             |
| C          | 5.66409300   | -0.17155800 | -0.00354400 | C          | -5.66733700  | 0.99852100  | 0.03006700  |
| C          | 6.70858100   | 1.84883100  | 0.04112100  | C          | -7.25271400  | -0.62511500 | -0.13201100 |
| C          | 6.97888200   | 3.21382800  | 0.07678300  | C          | -7.89757700  | -1.85874700 | -0.24777200 |
| C          | 8.31618700   | 3.59749700  | 0.10147000  | C          | -9.28330300  | -1.84109900 | -0.27891300 |
| C          | 9.35919800   | 2.66149700  | 0.09222400  | C          | -10.00755400 | -0.64144500 | -0.19952100 |
| C          | 9.07624800   | 1.30115500  | 0.06119900  | C          | -9.35227100  | 0.58466600  | -0.08666600 |
| C          | 7.74659100   | 0.89803600  | 0.03686400  | C          | -7.96868200  | 0.59006900  | -0.05395900 |
| H          | 6.18169900   | 3.94904000  | 0.08340500  | H          | -7.33776900  | -2.78450000 | -0.30813900 |
| H          | 8.55599500   | 4.65548300  | 0.12807200  | H          | -9.82139400  | -2.77822600 | -0.36704000 |
| H          | 9.86840200   | 0.55864400  | 0.05796500  | H          | -9.90653800  | 1.51521200  | -0.02751100 |
| H          | 10.38711500  | 3.00505400  | 0.11117200  | H          | -11.09043200 | -0.67336900 | -0.22806000 |
| C          | 4.73827100   | -1.16780600 | -0.01845200 | C          | -4.46519700  | 1.63354200  | 0.10024400  |
| H          | 5.17751600   | -2.16290800 | 0.01040100  | H          | -4.55805500  | 2.71665400  | 0.14750000  |
| C          | 3.31823700   | -1.09081400 | -0.05907600 | C          | -3.14272400  | 1.10422500  | 0.10927500  |
| C          | 2.49722500   | -2.24963600 | 0.02710000  | C          | -2.68906200  | -0.22584300 | 0.14449100  |
| C          | 2.43502500   | -0.00584600 | -0.17744700 | C          | -1.97856600  | 1.91727900  | 0.06861800  |
| C          | 1.12316200   | -0.51870000 | -0.15237800 | C          | -0.87235700  | 1.07033100  | 0.07324000  |
| H          | 2.64982700   | 1.04521100  | -0.28884300 | H          | -1.94484800  | 2.99620700  | 0.03195700  |
| C          | -1.15799000  | -0.55100000 | -0.13939700 | C          | 1.32505100   | 0.45159500  | 0.06519400  |
| C          | -2.52757800  | -2.28920600 | 0.06958600  | C          | 2.13631200   | -1.61080800 | 0.13205300  |
| C          | -2.45577300  | -0.03921400 | -0.14804700 | C          | 2.73091800   | 0.56420400  | 0.04013500  |
| C          | -3.34034400  | -1.14024400 | -0.01119000 | C          | 3.25813800   | -0.73661700 | 0.08141200  |
| C          | -4.75943400  | -1.20870500 | 0.05568000  | C          | 4.57891100   | -1.27147800 | 0.07523400  |

|            |              |             |             |            |             |             |             |
|------------|--------------|-------------|-------------|------------|-------------|-------------|-------------|
| H          | -5.14658900  | -2.22308300 | 0.15384300  | H          | 4.60893500  | -2.35998300 | 0.11912800  |
| C          | -5.71964700  | -0.23513400 | 0.02700500  | C          | 5.80323700  | -0.67086200 | 0.01936000  |
| C          | -5.66558600  | 1.25020900  | -0.07447000 | C          | 6.21024300  | 0.76857800  | -0.04619100 |
| N          | -7.07225100  | -0.57331300 | 0.11922000  | N          | 6.97863700  | -1.41245700 | 0.01459300  |
| C          | -7.06715800  | 1.67788400  | -0.02301400 | C          | 7.67043400  | 0.74230000  | -0.09020600 |
| C          | -7.87519400  | 0.52619000  | 0.09283800  | C          | 8.08420400  | -0.60244800 | -0.05348900 |
| H          | -7.40876000  | -1.52349900 | 0.19558200  | H          | 7.00895900  | -2.42023300 | 0.03132200  |
| C          | -7.64409800  | 2.93666800  | -0.06662100 | C          | 8.60891200  | 1.76778500  | -0.15780400 |
| C          | -9.03225800  | 3.03313500  | 0.00644500  | C          | 9.95769100  | 1.43663100  | -0.18842000 |
| H          | -9.50955500  | 4.00592000  | -0.02505100 | H          | 10.71005100 | 2.21543500  | -0.24110300 |
| C          | -9.26952400  | 0.61114300  | 0.16502700  | C          | 9.43468500  | -0.94697800 | -0.08422200 |
| C          | -9.82612500  | 1.87963700  | 0.11965700  | C          | 10.35482900 | 0.09155700  | -0.15244900 |
| H          | -7.02052300  | 3.82018800  | -0.15453200 | H          | 8.28051100  | 2.80217700  | -0.18550300 |
| H          | -10.90409000 | 1.98388100  | 0.17409300  | H          | 11.41307500 | -0.14775800 | -0.17768400 |
| H          | -9.88517600  | -0.27616400 | 0.25337500  | H          | 9.75399200  | -1.98267300 | -0.05650500 |
| O          | -4.67605100  | 1.96714000  | -0.17603700 | O          | 5.47411300  | 1.75132300  | -0.05890600 |
| N          | -1.22828400  | -1.93887000 | -0.00521100 | N          | 0.99653800  | -0.92020000 | 0.12265800  |
| N          | 1.20760000   | -1.92138600 | -0.02265300 | N          | -1.33784000 | -0.24122700 | 0.12477500  |
| B          | -0.01013400  | -2.88526200 | 0.01655200  | B          | -0.43945100 | -1.49466200 | 0.14358700  |
| F          | -0.00385000  | -3.72372900 | -1.09794200 | F          | -0.65527000 | -2.25373600 | 1.29437500  |
| F          | 0.01229200   | -3.65667300 | 1.17600500  | F          | -0.66842700 | -2.29225500 | -0.97932100 |
| H          | -2.82606600  | -3.32278500 | 0.17723800  | H          | 2.13879500  | -2.69274400 | 0.17064400  |
| H          | -2.73081600  | 0.99891500  | -0.23402100 | H          | 3.28886900  | 1.48406800  | -0.00342200 |
| H          | 2.81382000   | -3.28018000 | 0.12485500  | H          | -3.22445700 | -1.16104600 | 0.21476000  |
| H          | 4.60464700   | 1.67015400  | 0.09480800  | H          | -5.20052700 | -1.07241800 | -0.17039300 |
| N          | 5.48894100   | 1.19779400  | -0.00203800 | N          | -5.91053800 | -0.36177600 | -0.07290800 |
| C          | 7.13532600   | -0.42916600 | 0.01170700  | C          | -6.98733300 | 1.67870500  | 0.04830700  |
| O          | 7.67064500   | -1.53180100 | 0.00161800  | O          | -7.17844800 | 2.88400000  | 0.13337300  |
| N          | -0.01420800  | 0.15452600  | -0.22056800 | N          | 0.42930600  | 1.42659600  | 0.04014700  |
| <b>IB6</b> |              |             |             | <b>IB7</b> |             |             |             |
| C          | 5.71711700   | -0.60056700 | 0.04777900  | C          | 6.70873700  | 0.14898900  | -0.37584900 |
| C          | 6.83374000   | 1.37861800  | -0.07060400 | C          | 7.46511100  | 2.26870000  | -0.07254800 |
| C          | 7.14604000   | 2.73521800  | -0.17263900 | C          | 7.55602500  | 3.63860100  | 0.16246400  |
| C          | 8.49114300   | 3.07490000  | -0.14578700 | C          | 8.79538900  | 4.24124600  | -0.02170100 |
| C          | 9.49666500   | 2.10370200  | -0.02372400 | C          | 9.92377100  | 3.51171700  | -0.42556600 |
| C          | 9.17232800   | 0.75169200  | 0.07279200  | C          | 9.82033800  | 2.14957600  | -0.66829600 |
| C          | 7.83525400   | 0.39147900  | 0.04839500  | C          | 8.58423900  | 1.52963200  | -0.49920300 |
| H          | 6.37186200   | 3.48757100  | -0.26560900 | H          | 6.69280600  | 4.21477700  | 0.47781100  |
| H          | 8.77194800   | 4.11965700  | -0.22004200 | H          | 8.89066200  | 5.30829300  | 0.15432000  |
| H          | 9.94155400   | -0.00768600 | 0.16423300  | H          | 10.67693800 | 1.56658700  | -0.99357300 |
| H          | 10.53508600  | 2.41317000  | -0.00683400 | H          | 10.87337600 | 4.02005200  | -0.55138900 |
| C          | 4.73381800   | -1.54020600 | 0.08420800  | C          | 5.90470300  | -0.93644100 | -0.49733100 |
| H          | 5.12320900   | -2.55483600 | 0.14577800  | H          | 6.40265000  | -1.80927200 | -0.91487700 |
| C          | 3.31589600   | -1.40825900 | 0.04920700  | C          | 4.52153200  | -1.06930600 | -0.16410800 |
| C          | 2.50013200   | -0.26022200 | 0.05818900  | C          | 3.75627200  | -2.19431500 | -0.51182200 |

|   |              |             |             |   |              |             |             |
|---|--------------|-------------|-------------|---|--------------|-------------|-------------|
| C | 2.43430300   | -2.51655500 | -0.00320800 | C | 3.64751700   | -0.19748700 | 0.53624900  |
| C | 1.13136000   | -2.01999900 | -0.03010500 | C | 2.39046900   | -0.81661300 | 0.57518300  |
| H | 2.70930400   | -3.56074400 | -0.02333600 | H | 3.87547200   | 0.75265100  | 0.99455400  |
| C | -1.14835400  | -2.04466100 | -0.07729700 | C | 1.17131000   | -0.41809200 | 1.11354500  |
| C | -2.52633300  | -0.29135000 | -0.03447500 | H | 1.07612200   | 0.47938500  | 1.70541300  |
| C | -2.45942700  | -2.54809900 | -0.10888000 | N | 0.01733100   | -2.21182200 | 0.13327900  |
| C | -3.34366700  | -1.45393800 | -0.08001100 | N | 2.48629700   | -2.03796700 | -0.08773600 |
| C | -4.76257800  | -1.59452200 | -0.09350800 | B | 1.37240400   | -3.06895100 | 0.01409400  |
| H | -5.09421200  | -2.63144500 | -0.13912100 | F | 1.27950500   | -3.86723300 | -1.10652500 |
| C | -5.77108000  | -0.67438000 | -0.05519300 | F | 1.47746300   | -3.82357400 | 1.17560800  |
| C | -5.76149900  | 0.81716500  | 0.02093000  | H | 4.06411800   | -3.08677500 | -1.03852800 |
| N | -7.10898000  | -1.05780100 | -0.07488700 | H | 5.42987800   | 1.78503500  | 0.01407900  |
| C | -7.16971900  | 1.20091000  | 0.04418400  | N | 6.37271200   | 1.43014100  | 0.07340800  |
| C | -7.94571100  | 0.02691300  | -0.01431600 | C | 8.15286300   | 0.14943900  | -0.71416900 |
| H | -7.41809400  | -2.01714100 | -0.11985700 | O | 8.81616600   | -0.81836300 | -1.08816000 |
| C | -7.77735200  | 2.44930700  | 0.11005500  | C | -1.08913400  | -2.62925700 | -0.44016200 |
| C | -9.16488800  | 2.51322500  | 0.11849400  | H | -0.99519500  | -3.52792500 | -1.03345400 |
| H | -9.66670200  | 3.47284800  | 0.16985900  | C | -2.32221400  | -1.93933000 | -0.32521900 |
| C | -9.33961300  | 0.07921900  | -0.00560700 | C | -3.64824000  | -0.32732100 | 0.45437600  |
| C | -9.92732500  | 1.33611600  | 0.06197300  | C | -3.49937400  | -2.04582900 | -1.03277700 |
| H | -7.16819400  | 3.34656700  | 0.15328400  | C | -4.36309800  | -1.01041400 | -0.55406600 |
| H | -11.01000200 | 1.40770900  | 0.07062800  | B | -1.32849800  | -0.63021800 | 1.61744600  |
| H | -9.94001200  | -0.82219000 | -0.04928700 | F | -1.24640700  | 0.70621100  | 1.95308000  |
| O | -4.78224200  | 1.55813800  | 0.05753500  | F | -1.54245900  | -1.42626400 | 2.74046600  |
| N | -1.23412200  | -0.64060000 | -0.03336300 | N | -2.44029400  | -0.88848100 | 0.57891500  |
| N | 1.20204400   | -0.62730000 | 0.01275500  | H | -3.96534900  | 0.50081100  | 1.06509600  |
| B | -0.02050400  | 0.31906400  | 0.00087400  | N | -0.00349800  | -1.07625500 | 0.90845300  |
| F | -0.04778800  | 1.11534100  | 1.14585500  | H | -3.71865400  | -2.75197200 | -1.82038900 |
| F | -0.00096400  | 1.13966600  | -1.12782100 | C | -5.65820500  | -0.81260300 | -1.08485800 |
| H | -2.84744700  | 0.73819300  | -0.00401800 | H | -5.92500700  | -1.50913500 | -1.87828600 |
| H | -2.72051600  | -3.59543300 | -0.14259400 | C | -6.63476200  | 0.10685200  | -0.77584700 |
| H | 2.75199800   | 0.78860100  | 0.11950800  | C | -6.71124300  | 1.20031300  | 0.23445700  |
| H | 4.73672600   | 1.27835000  | -0.19360500 | C | -8.03564400  | 1.80044700  | 0.03459200  |
| N | 5.60116000   | 0.77556400  | -0.06006900 | C | -8.67404000  | 1.10961400  | -1.01227300 |
| C | 7.16862800   | -0.91307400 | 0.12296500  | H | -8.05692300  | -0.50652500 | -2.22129200 |
| O | 7.66297000   | -2.02762300 | 0.22680700  | C | -8.67617200  | 2.84947200  | 0.66984400  |
| N | -0.01071600  | -2.72893500 | -0.07919400 | C | -9.95352100  | 1.44321900  | -1.45401100 |
|   |              |             |             | C | -9.95755600  | 3.19410300  | 0.23963200  |
|   |              |             |             | C | -10.58074800 | 2.49882400  | -0.80609300 |
|   |              |             |             | H | -10.43213500 | 0.90358500  | -2.26191400 |
|   |              |             |             | H | -10.48295200 | 4.01210600  | 0.71793000  |
|   |              |             |             | H | -11.57683700 | 2.79178900  | -1.11708200 |
|   |              |             |             | H | -8.18868200  | 3.38486400  | 1.47670700  |
|   |              |             |             | O | -5.85841800  | 1.52080100  | 1.04884800  |
|   |              |             |             | N | -7.83264200  | 0.12486000  | -1.46183900 |

| <b>IB8</b> |             |             |             |
|------------|-------------|-------------|-------------|
| C          | 6.74371800  | -0.64067900 | -0.74985100 |
| C          | 7.99692800  | 1.24539400  | -0.58083400 |
| C          | 8.42211300  | 2.55643600  | -0.38597600 |
| C          | 9.74127200  | 2.85810100  | -0.70584100 |
| C          | 10.62383500 | 1.88922400  | -1.20554900 |
| C          | 10.18649900 | 0.58802200  | -1.40711400 |
| C          | 8.86492800  | 0.26911100  | -1.10036400 |
| H          | 7.75095000  | 3.31391400  | 0.00407600  |
| H          | 10.09695100 | 3.87362200  | -0.56175100 |
| H          | 10.84861600 | -0.17537100 | -1.80485600 |
| H          | 11.64665400 | 2.16489700  | -1.43708600 |
| C          | 5.70158100  | -1.50690200 | -0.74573200 |
| H          | 5.92530200  | -2.47423200 | -1.19033900 |
| C          | 4.37151500  | -1.29893600 | -0.25679500 |
| C          | 3.90766600  | -0.25095600 | 0.55861300  |
| C          | 3.25671800  | -2.13942900 | -0.49571100 |
| C          | 2.15631900  | -1.57156400 | 0.15690000  |
| H          | 3.24294000  | -3.03069500 | -1.10528400 |
| C          | 0.81518800  | -1.94018900 | 0.22817400  |
| H          | 0.45609100  | -2.86910000 | -0.18707800 |
| N          | 0.19965700  | 0.05788100  | 1.29651400  |
| N          | 2.58787800  | -0.41523800 | 0.79904500  |
| B          | 1.70483400  | 0.29522200  | 1.81066800  |
| F          | 1.79052700  | -0.27937900 | 3.07361600  |
| F          | 1.93819900  | 1.65456200  | 1.85544900  |
| H          | 4.44632800  | 0.55360000  | 1.03661400  |
| H          | 5.92518700  | 1.25218600  | -0.31093200 |
| N          | 6.76034400  | 0.68378700  | -0.29971300 |
| C          | 8.10677700  | -0.97487000 | -1.23708200 |
| O          | 8.48591500  | -2.06906800 | -1.65094100 |
| C          | -0.71132400 | 0.99112700  | 1.46835000  |
| H          | -0.35153900 | 1.91898300  | 1.88971000  |
| C          | -2.07059500 | 0.81614900  | 1.10672700  |
| C          | -3.80787700 | -0.35453600 | 0.34456100  |
| C          | -3.10933600 | 1.71421100  | 0.99188800  |
| C          | -4.23441600 | 0.98290700  | 0.49541100  |
| B          | -1.63233800 | -1.68202200 | 0.90859900  |
| F          | -1.82342900 | -2.19268400 | 2.19147100  |
| F          | -1.87455200 | -2.64047000 | -0.05544900 |
| N          | -2.52286700 | -0.43794200 | 0.71240200  |
| H          | -4.36853200 | -1.21391400 | 0.01691700  |
| N          | -0.16033900 | -1.15839300 | 0.76851900  |
| H          | -3.07672900 | 2.77199600  | 1.20857000  |
| C          | -5.48311800 | 1.60751700  | 0.26998200  |

|   |              |             |             |
|---|--------------|-------------|-------------|
| H | -5.49782000  | 2.66886300  | 0.51308500  |
| C | -6.67944100  | 1.11143500  | -0.19353700 |
| C | -7.10434600  | -0.24072800 | -0.64941900 |
| C | -8.51491300  | -0.08166200 | -1.02419300 |
| C | -8.87795800  | 1.26003400  | -0.79625300 |
| H | -7.78634400  | 2.91361400  | -0.06896600 |
| C | -9.44386100  | -0.98147200 | -1.51484000 |
| C | -10.16544700 | 1.73558000  | -1.04492600 |
| C | -10.73515700 | -0.51959000 | -1.77003300 |
| C | -11.08409400 | 0.81850500  | -1.53547800 |
| H | -10.43303600 | 2.76938100  | -0.86312400 |
| H | -11.48357100 | -1.20205300 | -2.15482800 |
| H | -12.09673000 | 1.14491200  | -1.74234500 |
| H | -9.16853400  | -2.01523000 | -1.69173200 |
| O | -6.42484400  | -1.25505600 | -0.69799900 |
| N | -7.78510000  | 1.93132200  | -0.31501100 |

**SIT5.** Computed Stokes shift for IB0 and designed IBs at M06L/6-311G(d,p) level

| <b>Molecules</b> | <b>Stokes Shift (cm<sup>-1</sup>)</b> |
|------------------|---------------------------------------|
| IB0              | 1396.87                               |
| IB1              | 1432.01                               |
| IB2              | 1184.23                               |
| IB3              | 1571.18                               |
| IB4              | 1358.31                               |
| IB5              | 1850.12                               |
| IB6              | 1428.28                               |
| IB7              | 2618.66                               |
| IB8              | 2611.10                               |

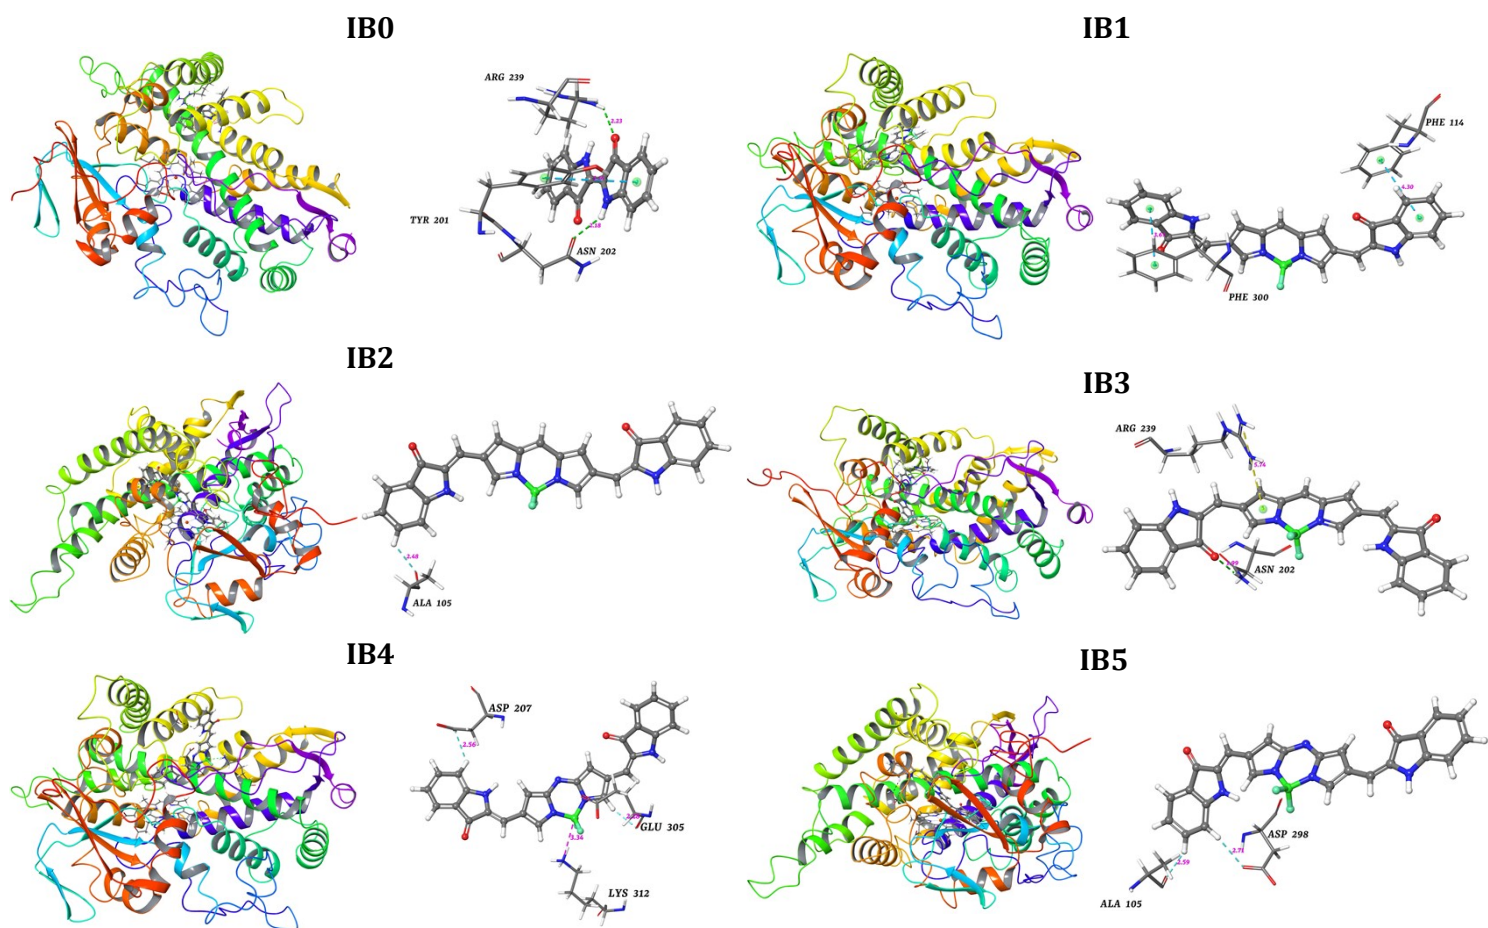

**SIF 5.** 3D binding interaction view of IB0 and designed IBs (IB1-IB5) with CYP17A1 (3RUK) docked complexes

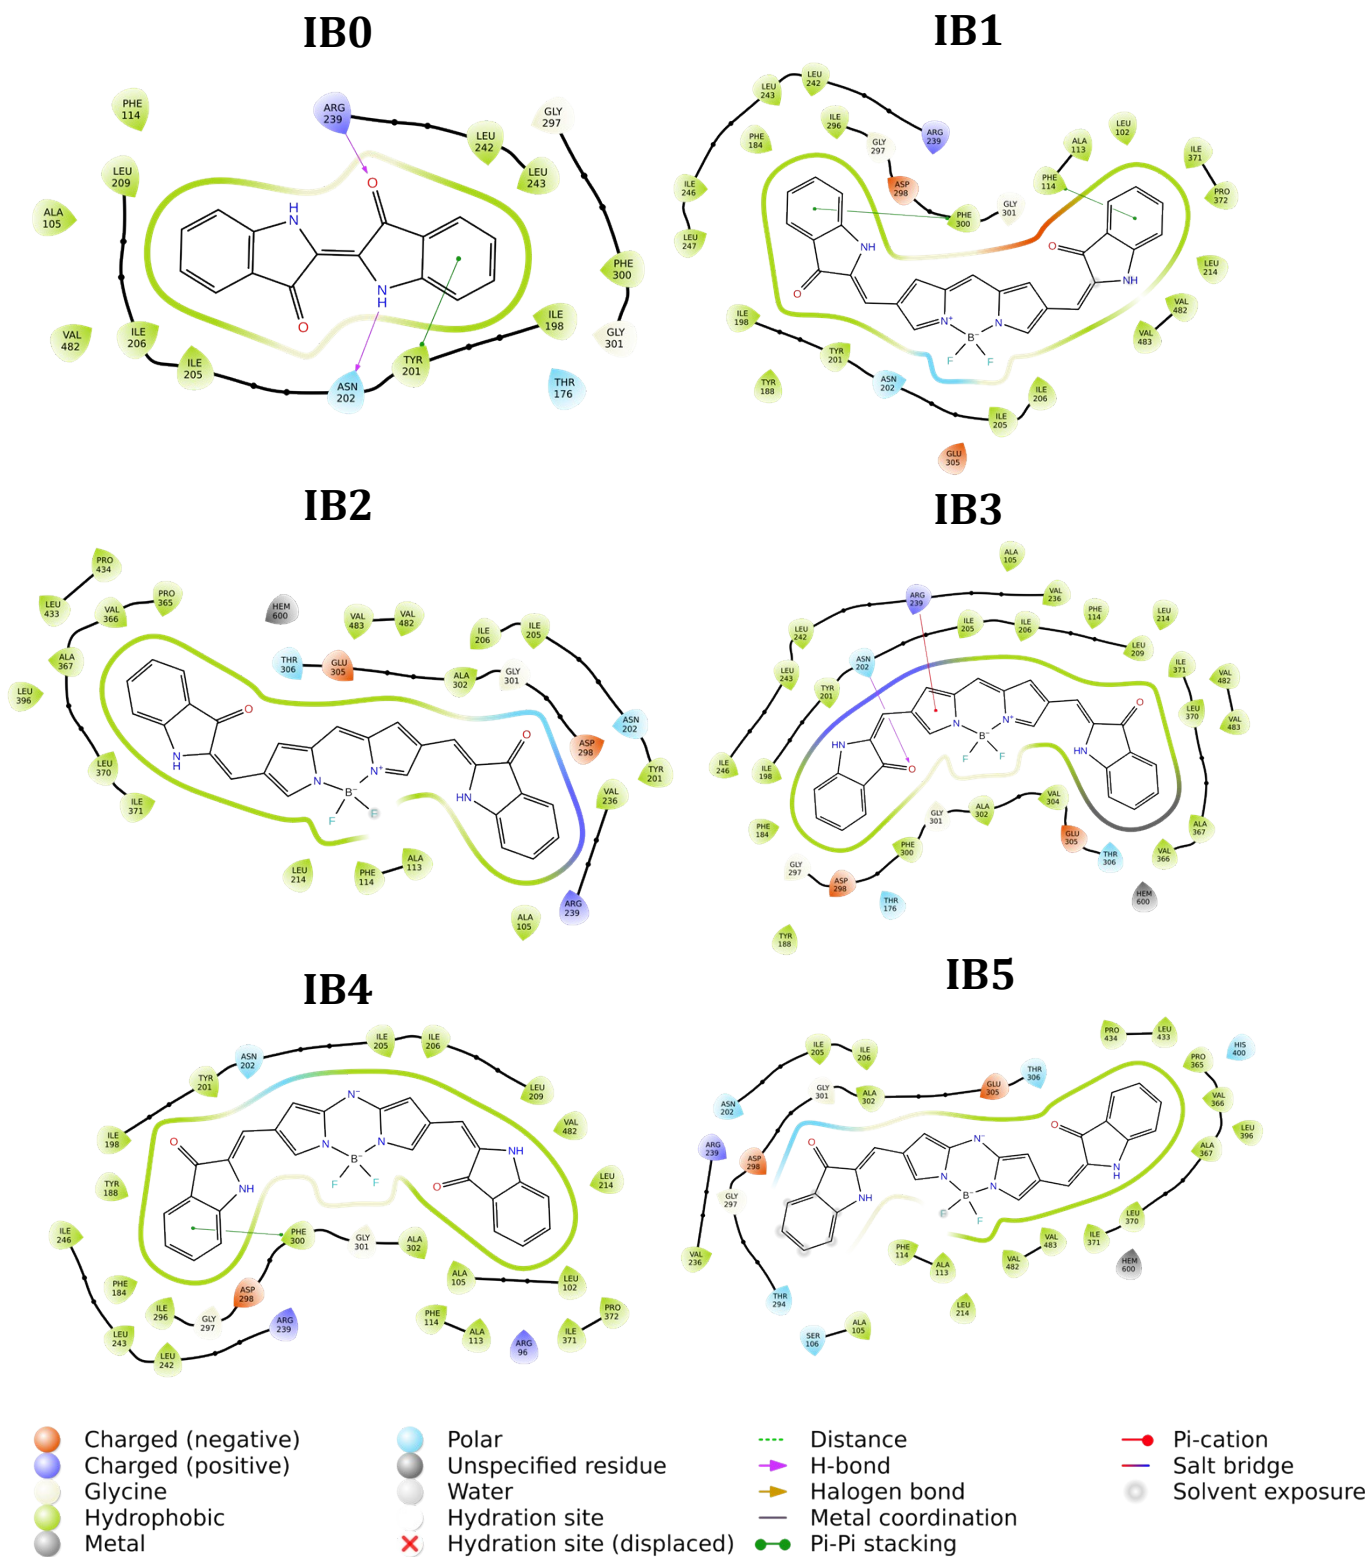

**SIF 6.** 2D binding interaction view of IB0 and designed IBs (IB1-IB5) with CYP17A1 (3RUK) docked complexes

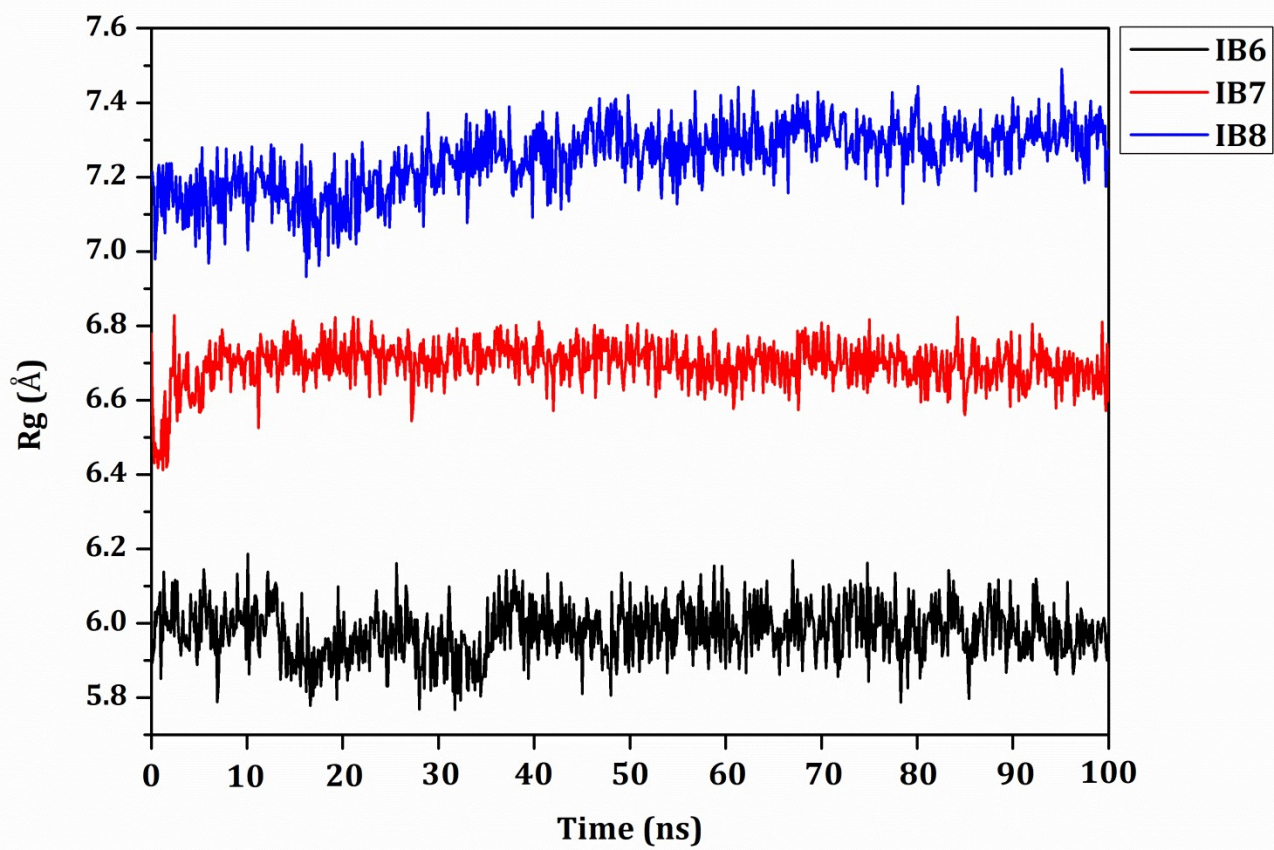

**SIF 7.** Radius of the gyration graph during MD simulation
